# Supplementary material for: Identification and Expression Pattern Analysis of the SOS Gene Family in Tomatoes
Source: MDPI journal article supplement (doi:10.3390/agronomy14040773), 2024-04-09
Supplement: s1 [file s1]

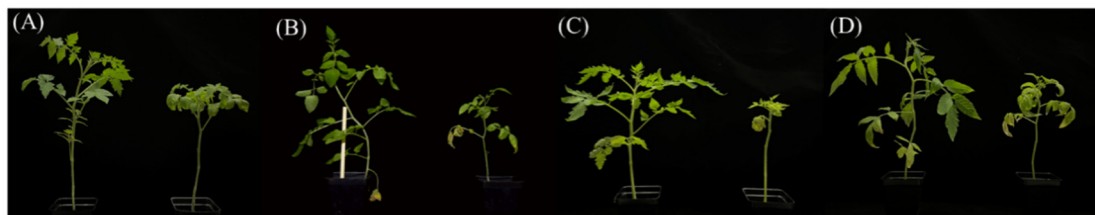

**Figure S1.** Morphological characteristics of different tomato genotypes at control (left) and salt stress (right) for seven days  
A. “LA0516”; B. “LA1598”; C. “LA1698”; D. “LA0012”

**Table S1.** Tomato genotypes used in the experiment

| Name       | Species                         | Origin   | Salt sensibility |
|------------|---------------------------------|----------|------------------|
| LA0716     | <i>Solanum pennellii</i>        | US(TGRC) | Salt tolerance   |
| LA2093     | <i>Solanum pimpinellifolium</i> | US(TGRC) | Salt tolerance   |
| Heinz 1706 | <i>Solanum lycopersicum</i> L.  | US(TGRC) | Salt sensitivity |
| LA0516     | <i>Solanum lycopersicum</i> L.  | US(TGRC) | Salt tolerance   |
| LA1598     | <i>Solanum pimpinellifolium</i> | US(TGRC) | Salt tolerance   |
| LA1698     | <i>Solanum lycopersicum</i> L.  | US(TGRC) | Salt sensitivity |
| LA0012     | <i>Solanum lycopersicum</i> L.  | US(TGRC) | Salt sensitivity |

Note: *Solanum lycopersicum* L. is the cultivated tomato; *Solanum pimpinellifolium* is one kind of wild tomato.  
US: the United States of America; TGRC: Tomato Genetic Resources Center, University of California, Davis.

**Table S2.** Primer sequence information for qRT-PCR

| Gene Name        | Gene Identity      | Forward primer (5' to 3') | Reverse primer (5' to 3') |
|------------------|--------------------|---------------------------|---------------------------|
| Actin            | Solyc04g011500.2   | CCACCGGTATTGTGTTGGAC      | AGTCAAGACGGAGAATGGCA      |
| <i>SpeSOS1-1</i> | Sopen01g001090.1   | GCTTGGTGGACTTCTAAGCG      | ACAACAATTGCCGTCCCATC      |
| <i>SpeSOS1-2</i> | Sopen01g001090.2   | GAAGGCTCAAGTGCAAGGAG      | TCGCCACCAGAATCATCACT      |
| <i>SpeSOS1-3</i> | Sopen01g001090.3   | TCCTGGAATTAGTGCAGCCA      | AATTGGTGCGCTTGGAAGTT      |
| <i>SpeSOS1-4</i> | Sopen04g009310.1   | TTCTTCAGCACAAGTGTTTGTG    | TTGCAGCATTTCCATTATCACC    |
| <i>SpeSOS2-1</i> | Sopen00g004210.1   | TATGGAAGTTGTGGCCCAGT      | TCTTGTTTGCGGAGAGACCT      |
| <i>SpeSOS2-2</i> | Sopen00g004210.2   | AAGGTTATGATGGTGCTGTG      | ATACGAGTTTGAGGGTTTGG      |
| <i>SpeSOS2-3</i> | Sopen12g004550.1   | TATTTCGCGCCAACCTGCTA      | TTGTAATCGCGTGTGTGGAC      |
| <i>SpeSOS3-1</i> | Sopen03g023070.1   | CCCTGGTTACGAGGATCCAA      | GCTTCAACTTCACTCACCGT      |
| <i>SpeSOS3-2</i> | Sopen06g018020.1   | ACACACCCGGATATGAGGAG      | TCCTGAAGAGTGCTAGCTGA      |
| <i>SpeSOS3-3</i> | Sopen12g024390.1   | CCAAGGACTCCTCAAGCAGA      | TCCTTCAACTCATCGCGTTC      |
| <i>SpeSOS4-1</i> | Sopen02g035960.1   | AGAACCAGGTGCTTGAAGCA      | TGCCACATATCCCTGAACA       |
| <i>SpeSOS4-2</i> | Sopen02g035960.2   | GTGCTTGGCTGGAGCAATA       | GCGGATGTCATCTAGGCTCT      |
| <i>SpeSOS5-1</i> | Sopen03g031960.1   | CTTATACCACCCGCCGTAA       | AGACCCGGAATTGCTAGGAG      |
| <i>SpeSOS5-2</i> | Sopen06g032520.1   | TGCTAATCTCTTCGCCACCA      | TCGAAGAGGAAGAGGATGGC      |
| <i>SpiSOS1-1</i> | SPIMP01g0004920    | TTCCAAGCGCACCAATTGAA      | AGCTTGGTCTTCCCGAATCA      |
| <i>SpiSOS1-2</i> | SPIMP04g0128060    | GATTCTGTGGCTTTCTGCGT      | GTGCACTCCTTCCACAACAG      |
| <i>SpiSOS2-1</i> | SPIMP04g0144760    | GTGGGCAGGACTCAATGAAG      | GGGTCTTGAAACCCATGGAC      |
| <i>SpiSOS2-2</i> | SPIMP12g0341920    | TATTTCGCGCCAACCTGCTA      | TTGTAATCGCGTGTGTGGAC      |
| <i>SpiSOS3-1</i> | SPIMP03g0101000    | CGCAACGGAGTGATTGGATT      | CTCATTACAGCAGCGCCAAA      |
| <i>SpiSOS3-2</i> | SPIMP06g0187870    | ATAGAATTGGCGCTGGGAGT      | TTGGTGCTGATCATGCTGTG      |
| <i>SpiSOS3-3</i> | SPIMP12g0358170    | CCAAGGACTCCTCAAGCAGA      | TCCTTCAACTCATCGCGTTC      |
| <i>SpiSOS4-1</i> | SPIMP02g0081310    | GCTTCAATGCTGACGCCTAA      | GCAAGCTTCTTGCCCATCTT      |
| <i>SpiSOS5-1</i> | SPIMP03g0108780    | CTTATACCACCCGCCGTAA       | AGACCCGGAATTGCTAGGAG      |
| <i>SpiSOS5-2</i> | SPIMP06g0202660    | TGCTAATCTCTTCGCCACCA      | TCGAAGAGGAAGAGGATGGC      |
| <i>SlySOS1-1</i> | Solyc01g005020.3.1 | TATGATAATTCGTGGGGCTACC    | CCAAACCATAGCCAAAGTATCG    |
| <i>SlySOS1-2</i> | Solyc04g018090.2.1 | CTCCTTCGCCGTACCACTAT      | ACCAAGCTTTCCCAGTCGAT      |
| <i>SlySOS1-3</i> | Solyc04g018100.5.1 | TCTGGCGACTCAGGGATTAC      | TTGCGATTCTGTGAGCATGG      |
| <i>SlySOS2-1</i> | Solyc04g076810.4.1 | CCTGGCGAAGGAGTCAACAT      | GGATGACACCACAGGACCAG      |
| <i>SlySOS2-2</i> | Solyc12g009570.3.1 | TATTTCGCGCCAACCTGCTA      | TTGTAATCGCGTGTGTGGAC      |
| <i>SlySOS3-1</i> | Solyc03g083320.4.1 | TTCCACCCAAATGCACCAGT      | TCATTACAGCAGCGCCAAAAC     |
| <i>SlySOS3-2</i> | Solyc06g051970.3.1 | GCTGCATGAGTCAGACTTGG      | GTATCGGCATCGCTAAACGTC     |
| <i>SlySOS3-3</i> | Solyc12g055920.3.1 | CCAAGGACTCCTCAAGCAGA      | TCCTTCAACTCATCGCGTTC      |
| <i>SlySOS4-1</i> | Solyc02g091340.4.1 | CCGATCCTGGCGTTAGCAAT      | TGCTGACTTGTTGCCACAT       |
| <i>SlySOS5-1</i> | Solyc03g112880.1.1 | TCCTCCCCCATTAGTCTCGG      | AATTGCTAGGAGCTCGTCCG      |
| <i>SlySOS5-2</i> | Solyc06g076120.3.1 | CCTTCGACTTATACCACCTACC    | AGACCCAAAATTATTAGGGGCA    |

Continued Supplementary Table S2

|               |                    |                        |                        |
|---------------|--------------------|------------------------|------------------------|
| <i>SOS1-1</i> | Solyc01g005020.3.1 | TATGATAATTCGTGGGGCTACC | CCAAACCATAGCCAAAGTATCG |
| <i>SOS1-2</i> | Solyc04g018090.2.1 | CTCCTTCGCCGTACCACTAT   | ACCAAGCTTTCCCAGTCGAT   |
| <i>SOS2-1</i> | Solyc04g076810.4.1 | CCTGGCGAAGGAGTCAACAT   | GGATGACACCACAGGACCAG   |
| <i>SOS2-2</i> | Solyc12g009570.3.1 | TATTTCCCGCCAACCTGCTA   | TTGTAATCGCGTGTGTGGAC   |
| <i>SOS3-2</i> | Solyc06g051970.3.1 | GCTGCATGAGTCAGACTTGG   | GTATCGGCATCGCTAAACGTC  |
| <i>SOS3-3</i> | Solyc12g055920.3.1 | CCAAGGACTCCTCAAGCAGA   | TCCTTCAACTCATCGCGTTC   |
| <i>SOS4-1</i> | Solyc02g091340.4.1 | CCGATCCTGGCGTTAGCAAT   | TGCTGACTTGTTGCCCACAT   |
| <i>SOS5-1</i> | Solyc03g112880.1.1 | TCCTCCCCCATTAGTCTCGG   | AATTGCTAGGAGCTCGTCCG   |
| <i>SOS5-2</i> | Solyc06g076120.3.1 | CCTTCGACTTATACCACCTACC | AGACCCAAAATTATTAGGGGCA |

---

**Table S3.** The characteristics of SOS gene family in *S. pennellii*, *S. pimpinellifolium* and *S. lycopersicum*

| Variety | Gene name        | ID                 | Protein Length(aa) | Protein M.W (kDa) | pI   | Subcellular localization |
|---------|------------------|--------------------|--------------------|-------------------|------|--------------------------|
| LA0716  | <i>SpeSOS1-1</i> | Sopen01g001090.1   | 349                | 37.36             | 5.73 | vacuole                  |
|         | <i>SpeSOS1-2</i> | Sopen01g001090.2   | 1151               | 127.51            | 5.91 | cell membrane            |
|         | <i>SpeSOS1-3</i> | Sopen01g001090.3   | 897                | 100.84            | 6.23 | cell membrane            |
|         | <i>SpeSOS1-4</i> | Sopen04g009310.1   | 746                | 82.21             | 5.31 | cell membrane, vacuole   |
|         | <i>SpeSOS2-1</i> | Sopen00g004210.1   | 447                | 50.60             | 6.38 | cytoplasm                |
|         | <i>SpeSOS2-2</i> | Sopen00g004210.2   | 445                | 50.52             | 6.37 | cytoplasm                |
|         | <i>SpeSOS2-3</i> | Sopen12g004550.1   | 446                | 50.47             | 8.86 | cytoplasm                |
|         | <i>SpeSOS3-1</i> | Sopen03g023070.1   | 214                | 24.65             | 4.61 | cell membrane            |
|         | <i>SpeSOS3-2</i> | Sopen06g018020.1   | 214                | 24.55             | 4.52 | cell membrane            |
|         | <i>SpeSOS3-3</i> | Sopen12g024390.1   | 224                | 25.79             | 4.91 | cell membrane            |
|         | <i>SpeSOS4-1</i> | Sopen02g035960.1   | 339                | 37.38             | 7.66 | chloroplast              |
|         | <i>SpeSOS4-2</i> | Sopen02g035960.2   | 337                | 37.12             | 7.05 | chloroplast              |
|         | <i>SpeSOS5-1</i> | Sopen03g031960.1   | 427                | 46.21             | 5.15 | cell membrane            |
|         | <i>SpeSOS5-2</i> | Sopen06g032520.1   | 420                | 45.27             | 6.07 | cell membrane            |
|         | <i>SpiSOS1-1</i> | SPIMP01g0004920    | 1151               | 127.50            | 5.89 | cell membrane            |
| LA2093  | <i>SpiSOS1-2</i> | SPIMP04g0128060    | 962                | 105.73            | 5.55 | cell membrane, vacuole   |
|         | <i>SpiSOS2-1</i> | SPIMP04g0144760    | 447                | 50.64             | 6.38 | cytoplasm                |
|         | <i>SpiSOS2-2</i> | SPIMP12g0341920    | 368                | 41.68             | 9.25 | cytoplasm                |
|         | <i>SpiSOS3-1</i> | SPIMP03g0101000    | 214                | 24.59             | 4.52 | cell membrane            |
|         | <i>SpiSOS3-2</i> | SPIMP06g0187870    | 214                | 24.59             | 4.52 | cell membrane            |
|         | <i>SpiSOS3-3</i> | SPIMP12g0358170    | 224                | 25.80             | 4.91 | cell membrane            |
|         | <i>SpiSOS4-1</i> | SPIMP02g0081310    | 363                | 40.14             | 8.79 | chloroplast              |
|         | <i>SpiSOS5-1</i> | SPIMP03g0108780    | 427                | 46.17             | 5.06 | cell membrane            |
| LA1589  | <i>SpiSOS5-2</i> | SPIMP06g0202660    | 421                | 45.25             | 5.91 | cell membrane            |
|         | <i>SpmSOS1-1</i> | Sopim01g005020.0.1 | 1151               | 127.50            | 5.89 | cell membrane            |
|         | <i>SpmSOS1-2</i> | Sopim04g018090.0.1 | 332                | 35.97             | 8.46 | cell membrane, vacuole   |
|         | <i>SpmSOS1-3</i> | Sopim04g018100.0.1 | 698                | 77.63             | 5.91 | vacuole                  |
|         | <i>SpmSOS2-1</i> | Sopim04g076810.0.1 | 447                | 50.64             | 6.38 | cytoplasm                |
|         | <i>SpmSOS2-2</i> | Sopim12g009570.0.1 | 446                | 50.49             | 8.86 | cytoplasm                |
|         | <i>SpmSOS3-1</i> | Sopim03g083320.0.1 | 214                | 24.571            | 4.52 | cell membrane            |
|         | <i>SpmSOS3-2</i> | Sopim06g051970.0.1 | 214                | 24.59             | 4.52 | cell membrane            |
|         | <i>SpmSOS3-3</i> | Sopim12g055920.0.1 | 226                | 26.20             | 4.91 | cell membrane            |
|         | <i>SpmSOS4-1</i> | Sopim02g091340.0.1 | 309                | 33.97             | 5.99 | cytoplasm                |
|         | <i>SpmSOS5-1</i> | Sopim03g112880.0.1 | 427                | 46.17             | 5.06 | cell membrane            |
|         | <i>SpmSOS5-2</i> | Sopim06g076110.0.1 | 173                | 18.31             | 8.79 | cell membrane            |

Continued Supplementary Table S3

|               |                  |                    |      |        |      |                           |
|---------------|------------------|--------------------|------|--------|------|---------------------------|
| M82           | <i>SlmSOS1-1</i> | M82_01g005020.3.1  | 1151 | 127.50 | 5.89 | cell membrane             |
|               | <i>SlmSOS1-2</i> | M82_04g018100.3.1  | 976  | 107.38 | 5.64 | cell membrane,<br>vacuole |
|               | <i>SlmSOS2-1</i> | M82_04g076810.3.1  | 448  | 50.59  | 6.21 | cytoplasm                 |
|               | <i>SlmSOS2-2</i> | M82_12g009570.2.1  | 425  | 47.94  | 8.56 | cytoplasm                 |
|               | <i>SlmSOS3-1</i> | M82_03g083320.3.1  | 230  | 26.33  | 4.53 | cell membrane             |
|               | <i>SlmSOS3-2</i> | M82_06g051970.3.1  | 214  | 24.59  | 4.52 | cell membrane             |
|               | <i>SlmSOS3-3</i> | M82_12g055920.2.1  | 663  | 25.41  | 4.91 | cell membrane             |
|               | <i>SlmSOS4-1</i> | M82_02g091340.3.1  | 280  | 30.89  | 5.66 | chloroplast               |
|               | <i>SlmSOS5-1</i> | M82_06g076110.1.1  | 427  | 18.31  | 8.79 | cell membrane             |
|               | <i>SlySOS1-1</i> | Solyc01g005020.3.1 | 1151 | 127.50 | 5.89 | cell membrane             |
| Heinz<br>1706 | <i>SlySOS1-2</i> | Solyc04g018090.2.1 | 332  | 35.95  | 8.46 | cell membrane,<br>vacuole |
|               | <i>SlySOS1-3</i> | Solyc04g018100.5.1 | 983  | 77.28  | 5.85 | cell membrane,<br>vacuole |
|               | <i>SlySOS2-1</i> | Solyc04g076810.4.1 | 447  | 50.64  | 6.38 | cytoplasm                 |
|               | <i>SlySOS2-2</i> | Solyc12g009570.3.1 | 446  | 50.49  | 8.86 | cytoplasm                 |
|               | <i>SlySOS3-1</i> | Solyc03g083320.4.1 | 214  | 24.57  | 4.52 | cell membrane             |
|               | <i>SlySOS3-2</i> | Solyc06g051970.3.1 | 214  | 24.59  | 4.52 | cell membrane             |
|               | <i>SlySOS3-3</i> | Solyc12g055920.3.1 | 220  | 25.41  | 4.91 | cell membrane             |
|               | <i>SlySOS4-1</i> | Solyc02g091340.4.1 | 339  | 37.40  | 8.21 | chloroplast               |
|               | <i>SlySOS5-1</i> | Solyc03g112880.1.1 | 427  | 46.17  | 5.06 | cell membrane             |
|               | <i>SlySOS5-2</i> | Solyc06g076120.3.1 | 421  | 45.27  | 5.91 | cell membrane             |

**Table S4.** Kinds of cis elements in the upstream regions of SOS gene family in tomato

| Element                                                                                                                         | Function                                |
|---------------------------------------------------------------------------------------------------------------------------------|-----------------------------------------|
| ABRE                                                                                                                            | Absciscic acid responsiveness           |
| ARE                                                                                                                             | Anaerobic induction                     |
| AuxRR-core,<br>TGA-element                                                                                                      | Auxin responsiveness                    |
| MSA-like                                                                                                                        | Cell cycle regulation                   |
| circadian                                                                                                                       | Circadian control                       |
| TC-rich repeats                                                                                                                 | Defense and stress responsiveness       |
| HD-Zip 3, HD-Zip 1                                                                                                              | Differentiation of the mesophyll cells  |
| MBS                                                                                                                             | Drought-inducibility                    |
| GCN4-motif                                                                                                                      | Endosperm expression                    |
| ERE                                                                                                                             | Ethylene responsiveness                 |
| MBSI                                                                                                                            | Flavonoid biosynthetic genes regulation |
| GARE-motif                                                                                                                      | Gibberellin responsiveness              |
| ATC-motif, Box 4,<br>GA-motif, Gap-box,<br>GATA-motif,<br>G-Box, GT1-motif,<br>LS7, TCT-motif,<br>LAMP-element,                 | Light responsiveness                    |
| MBS                                                                                                                             | Drought-inducibility                    |
| GCN4-motif                                                                                                                      | Endosperm expression                    |
| ERE                                                                                                                             | Ethylene responsiveness                 |
| MBSI                                                                                                                            | Flavonoid biosynthetic genes regulation |
| GARE-motif                                                                                                                      | Gibberellin responsiveness              |
| ACE, AE-box,<br>ATC-motif, Box 4,<br>GA-motif, Gap-box,<br>GATA-motif,<br>G-Box, GT1-motif,<br>LS7, TCT-motif,<br>LAMP-element, | Light responsiveness                    |
| LTR                                                                                                                             | Low-temperature responsiveness          |
| CGTCA-motif,<br>TGACG-motif                                                                                                     | MeJA-responsiveness                     |

Continued Supplementary Table S4

| CAT-box | Meristem expression |
|---------|---------------------|
|---------|---------------------|
